# Supplementary material for: Hydrological response to warm and dry weather: do glacierscompensate?
Source: Copernicus journal article supplement (doi:10.5194/hess-2021-44), 2021-01-29
Supplement: Supplementary file 1 [file hess-2021-44-supplement.pdf]

## Supplementary information

### S1 Hydrological regimes of the different catchments

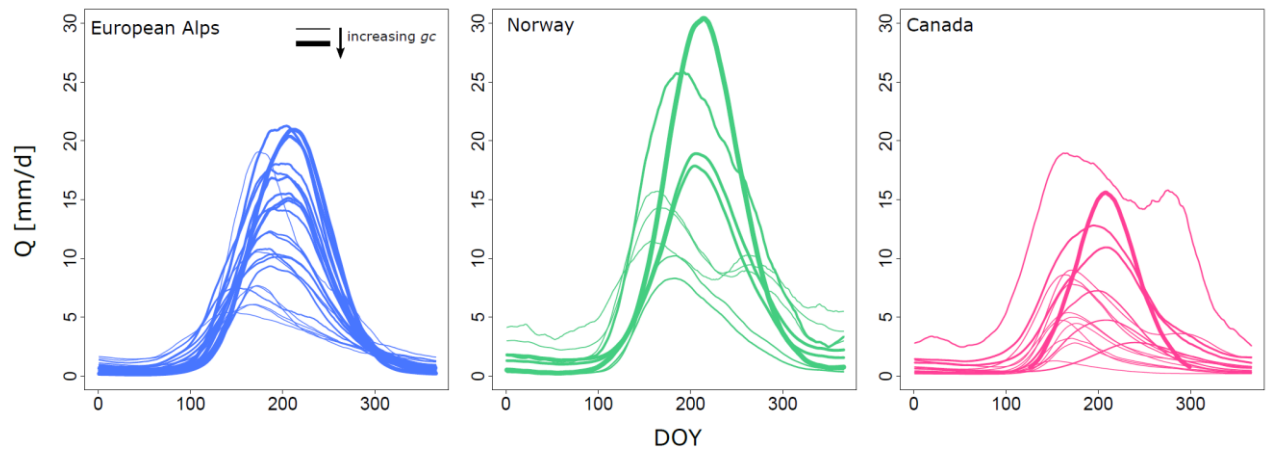

Figure S1 Long term DOY averages of streamflow, smoothed with a 30-day moving window.

Figure S2 Example of the event selection

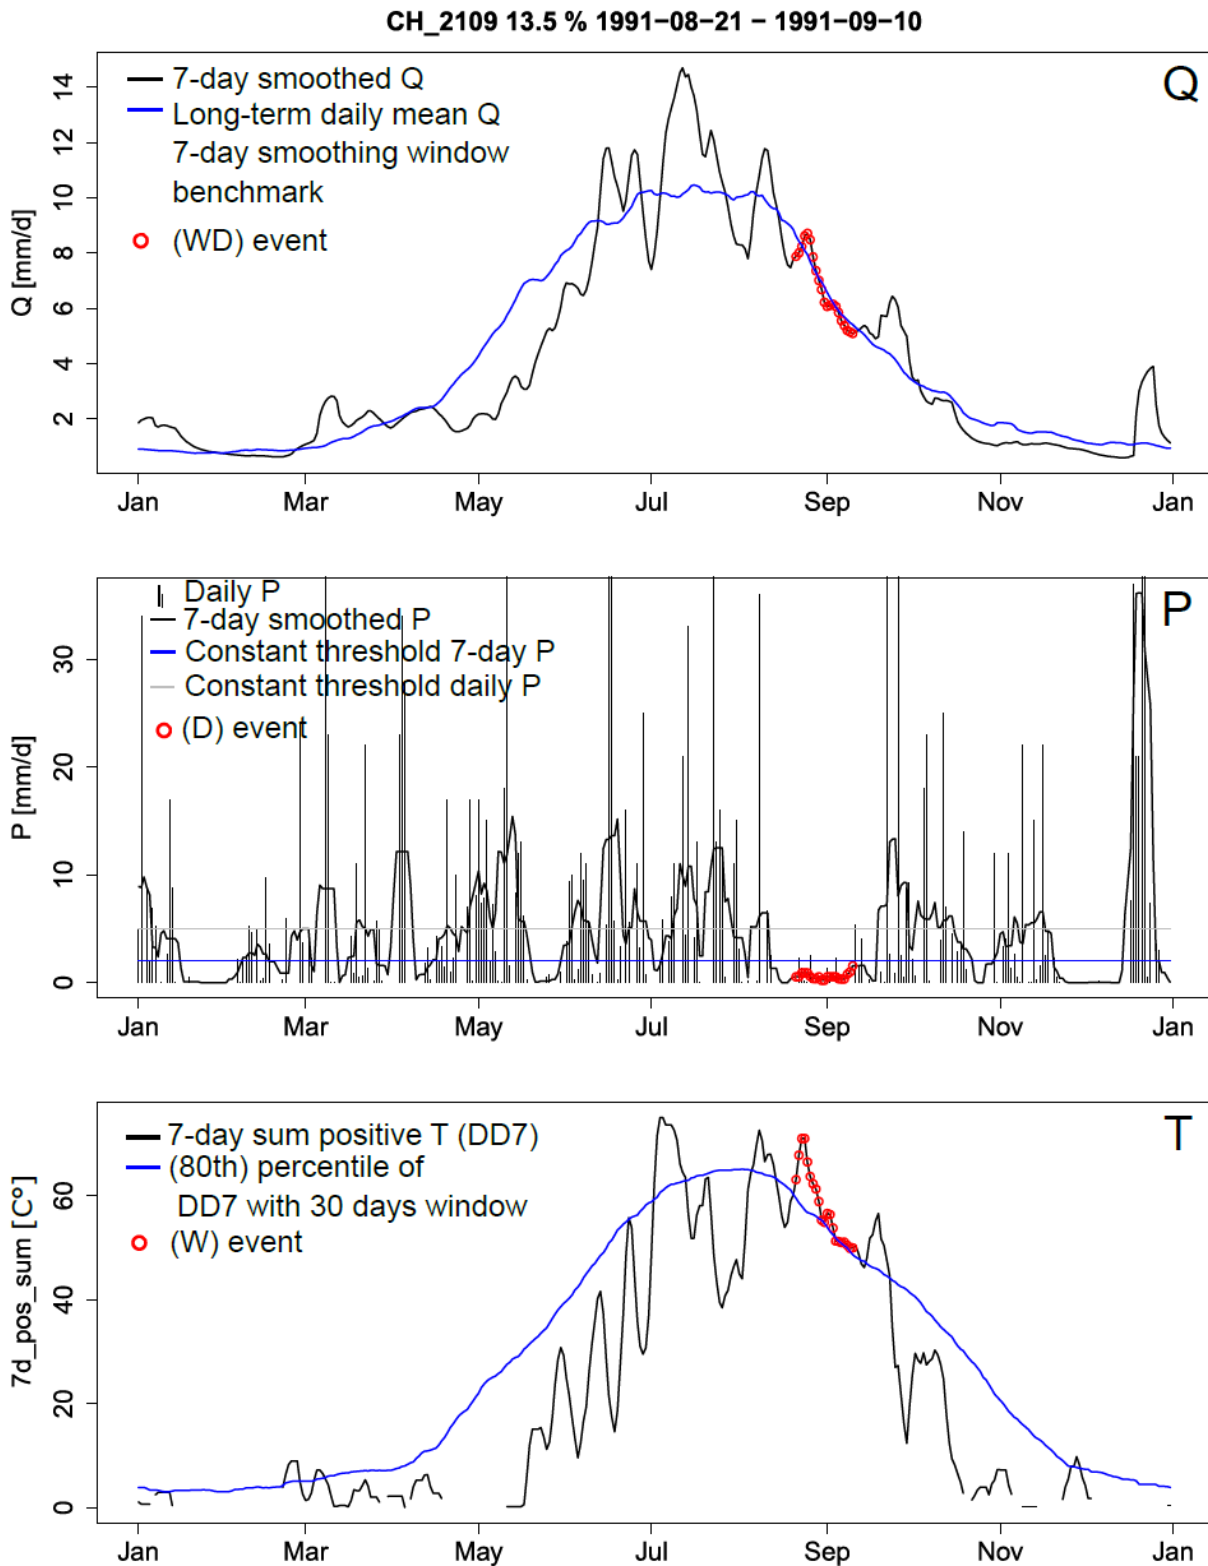

Figure S2 Example of the WD event selection for a Swiss catchment for the year 1991.
